# Supplementary material for: Multi-Year Leaf-Level Response to Sub-Ambient and Elevated Experimental CO2 in Betula nana
Source: PubMed Central journal article supplement (PMC4902311; doi:10.1371/journal.pone.0157400), 2016-06-10
Supplement: pone.0157400.s002.pdf [file pone.0157400.s002.pdf]

| <b>Species</b>              | <b>Study</b>             | <b>CO<sub>2</sub> range</b> | <b>% ppmv-1</b> |
|-----------------------------|--------------------------|-----------------------------|-----------------|
| <i>Betula nana</i>          | G2, this study           | 150—800                     | -0.06           |
|                             |                          | 150—450                     | -0.11           |
|                             | Gagen et al. 2011        | 290—380                     | -0.16           |
| <i>Nothofagus fusca</i>     | Hincke, <i>submitted</i> | 260—370                     | -0.21 — -0.31   |
|                             |                          | 260—650                     | -0.05 — -0.12   |
| <i>Sub-tropical (range)</i> | Lammertsma et al. 2011   | 290—390                     | -0.17 — -0.42   |
| <i>Abutilon theophrasti</i> | Bunce 2007               | 100—380                     | -0.18           |
| <i>Glycine max</i>          | Bunce 2007               | 100—380                     | -0.15           |
| <i>Gossypium hirsutum</i>   | Bunce 2007               | 100—380                     | -0.13           |
| <i>Xanthium strumarium</i>  | Bunce 2007               | 100—380                     | -0.15           |
| <i>Helianthus annuus</i>    | Rico et al. 2013         | 290—390                     | -0.22           |
|                             |                          | 390—480                     | -0.17           |
|                             |                          | 290—480                     | -0.18           |
| <i>Phaseolus vulgaris</i>   | Cowling & Sage 1998      | 200—380                     | -0.15 — -0.27   |
|                             |                          | 200—380                     | -0.15           |
| <i>Solanum dimidiatum</i>   | Maherali et al. 2002     | 200—550                     | -0.23           |
| <i>Bromus japonicus</i>     | Maherali et al. 2002     | 215—550                     | -0.15           |
